# Supplementary material
Source: PubMed Central journal article supplement (PMC1560350)

Kamon et al.  
Figure S1

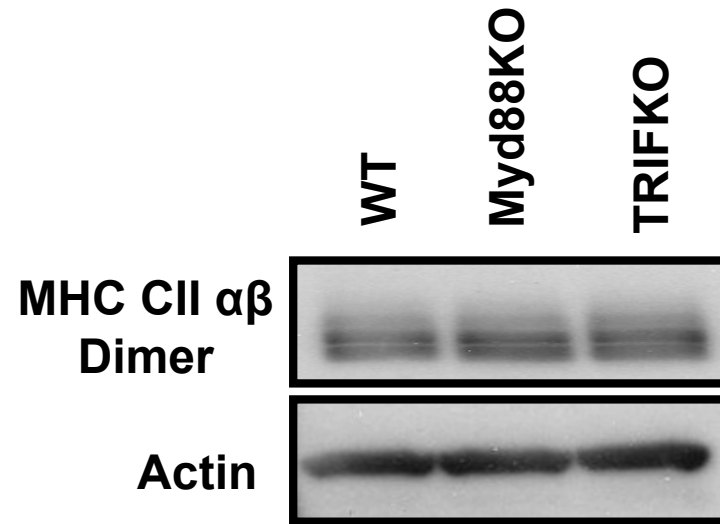

Kamon et al.  
Figure S2

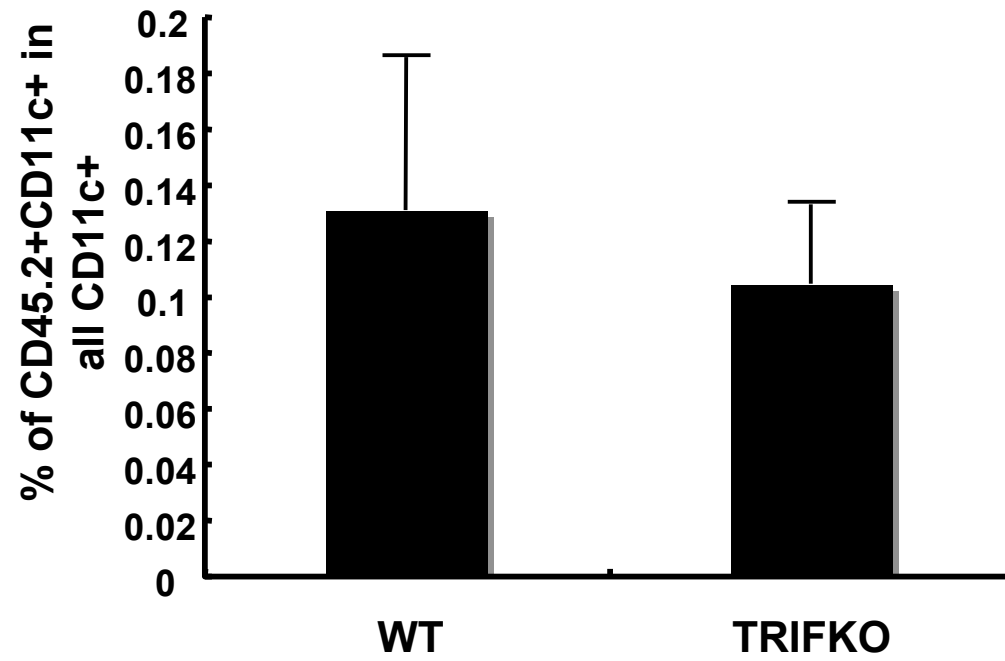

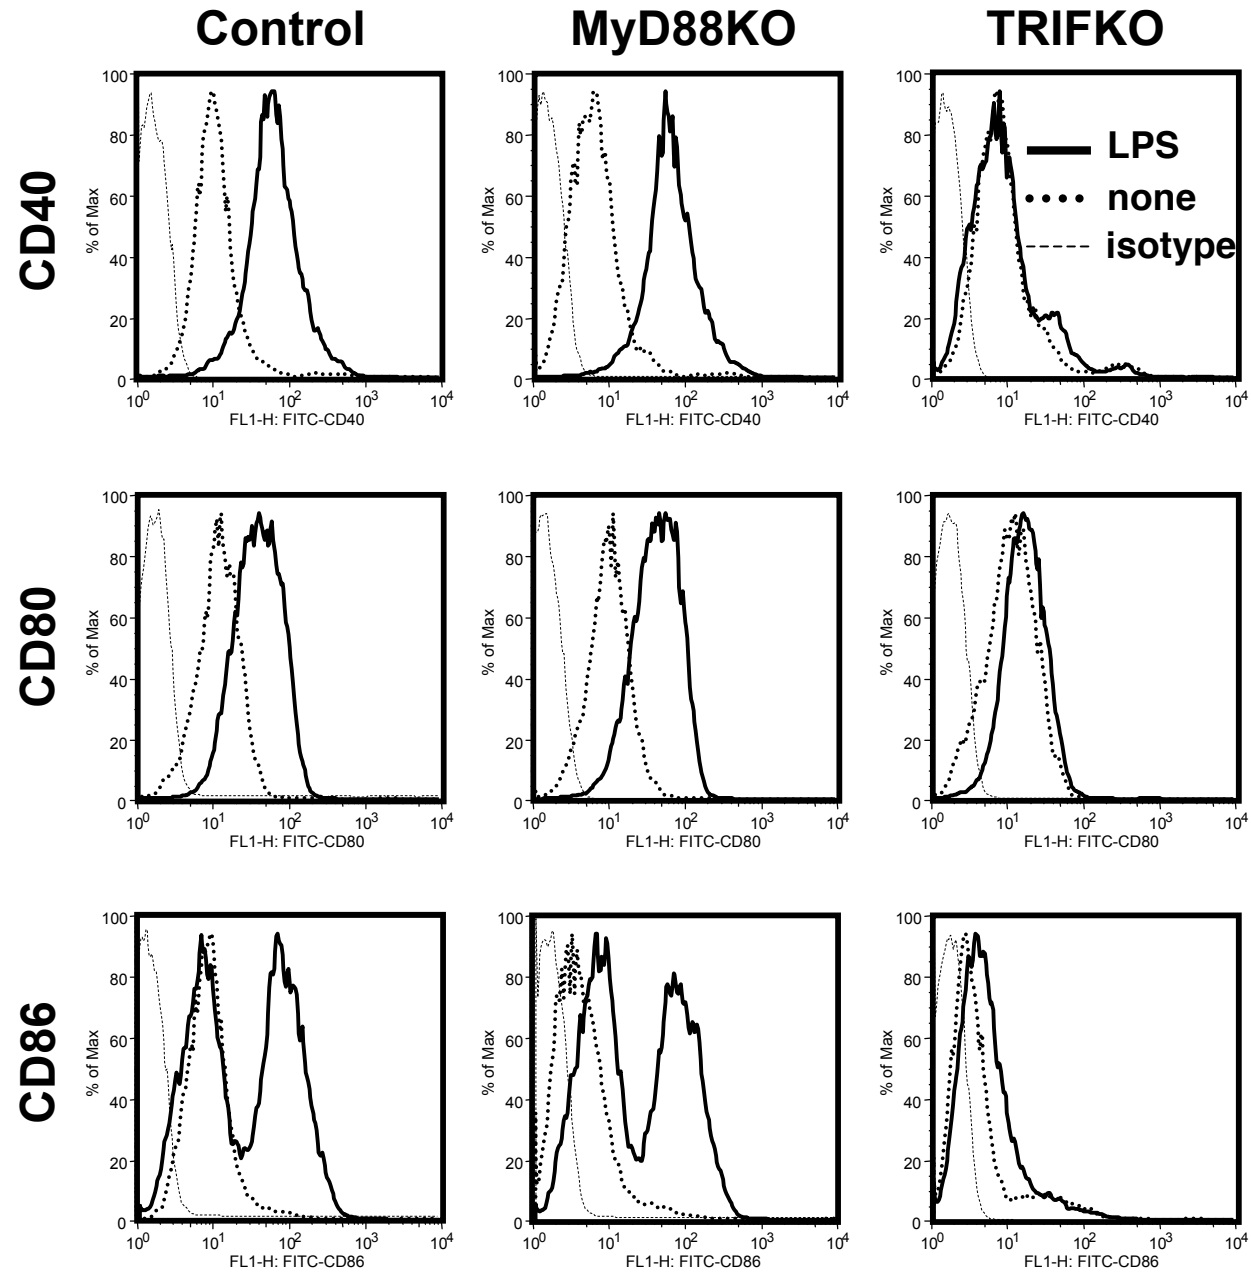

Figure S3

Kamon et al.  
Figure S4

### RhoA

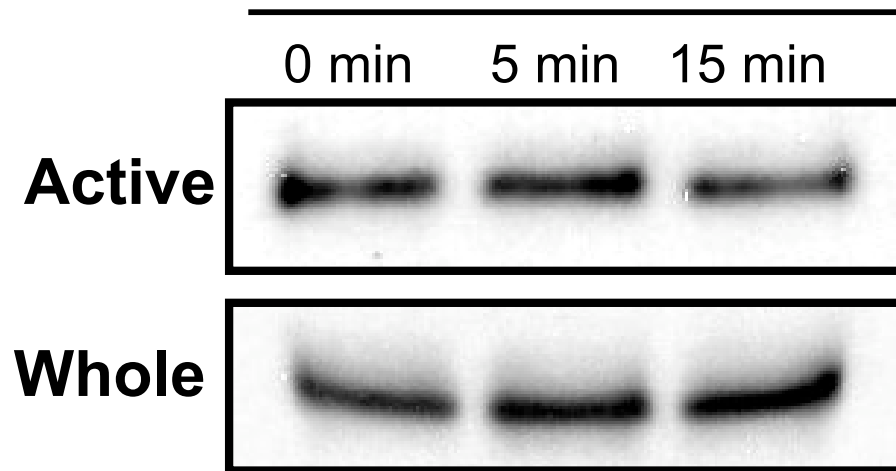

### RhoB

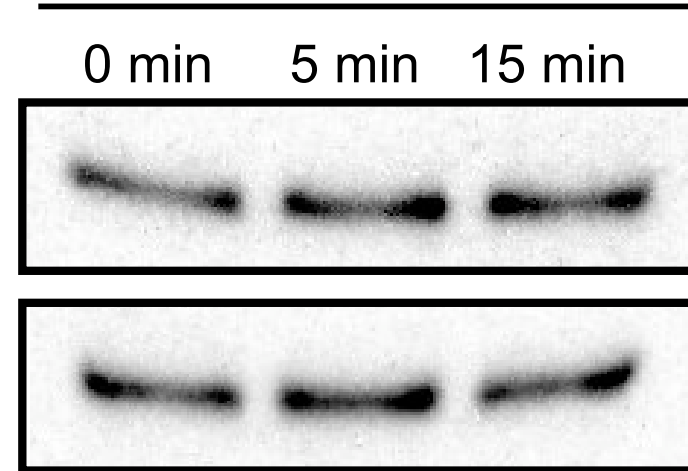

### Cdc42

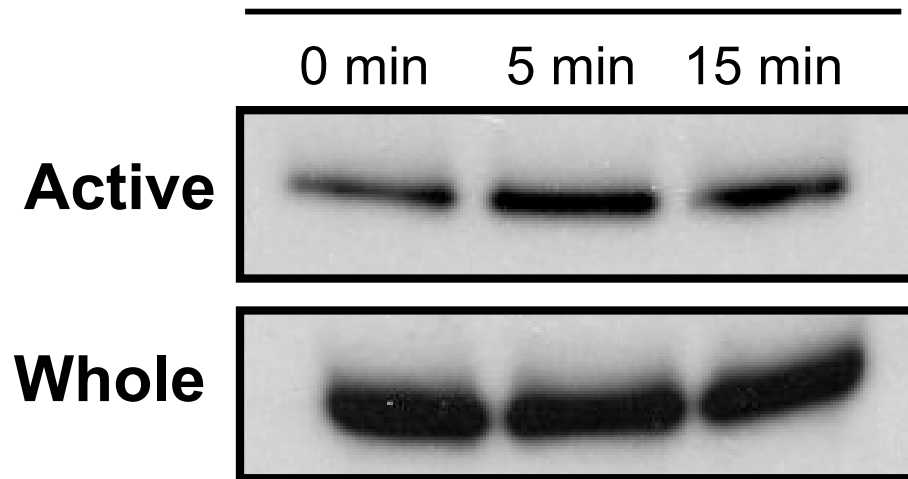

### Rac1/2

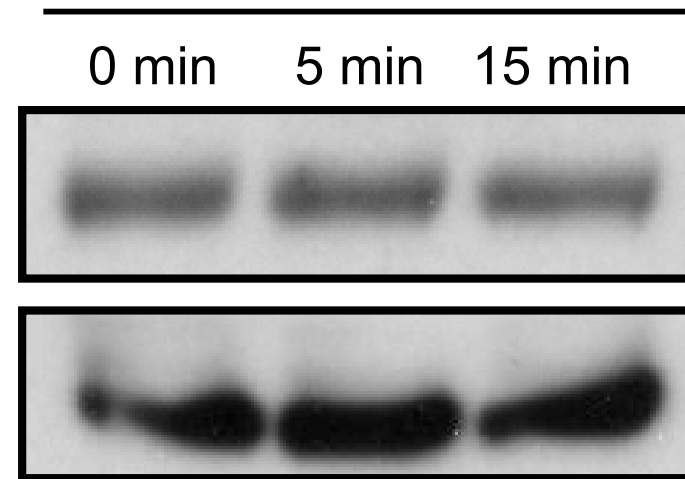

Kamon et al.  
Figure S5

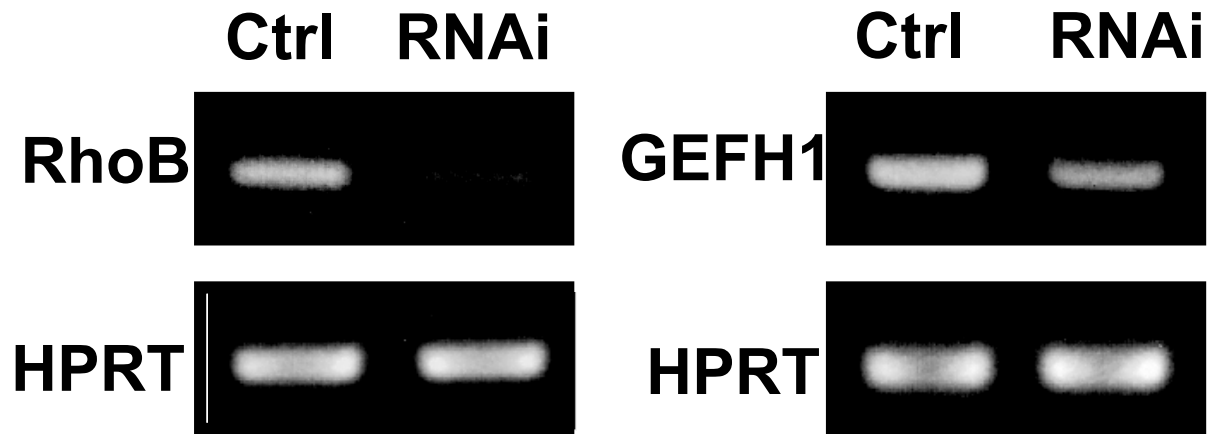

Kamon et al.  
Supplementary  
Figure S6

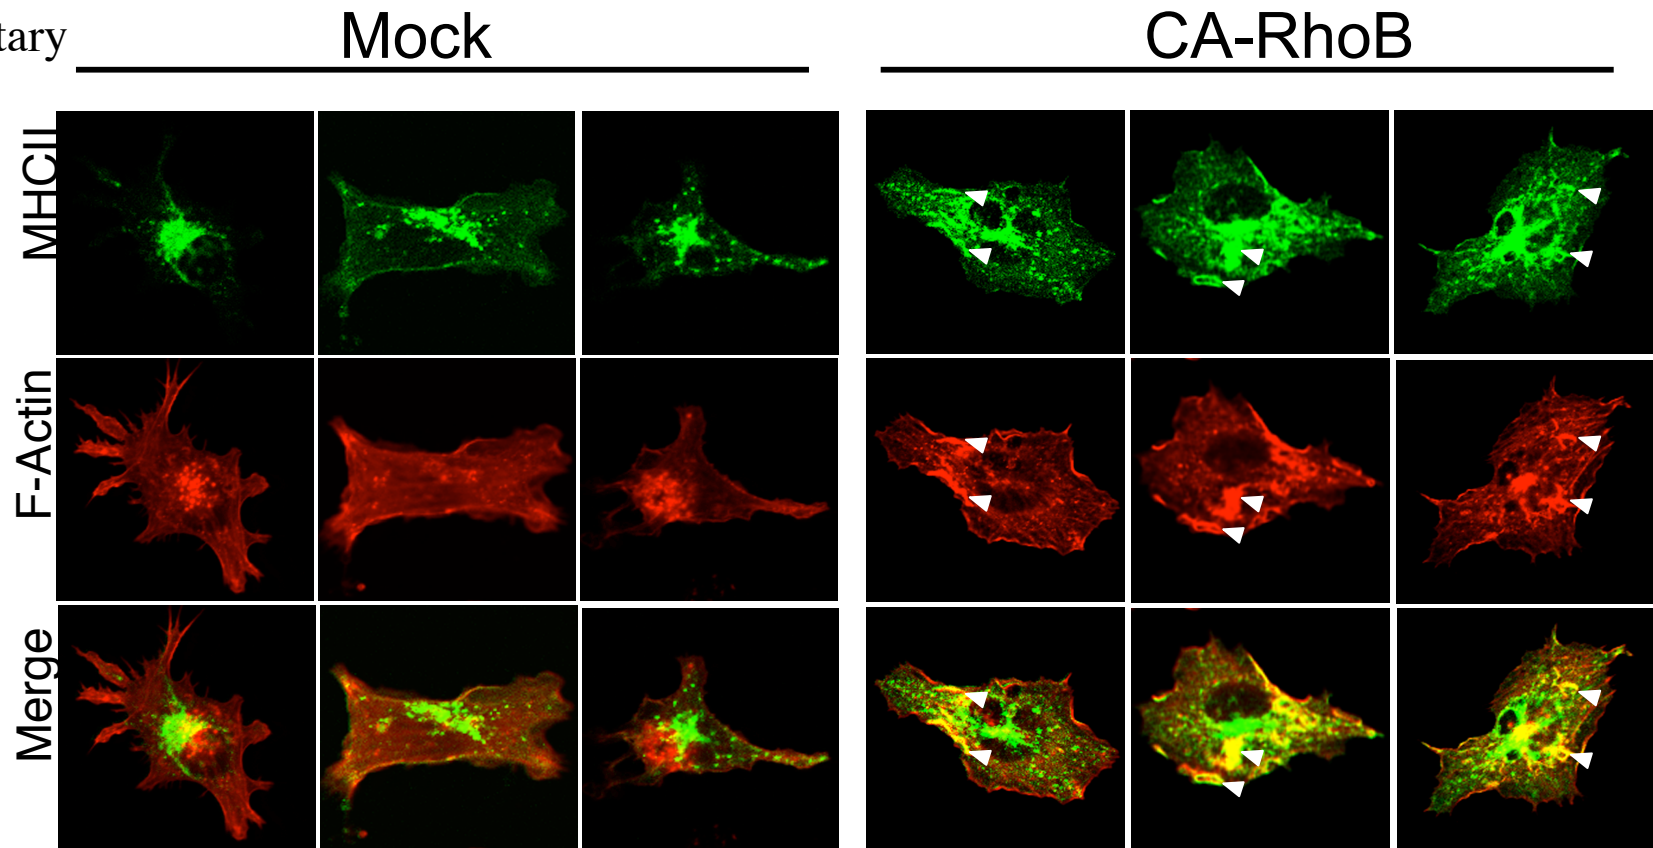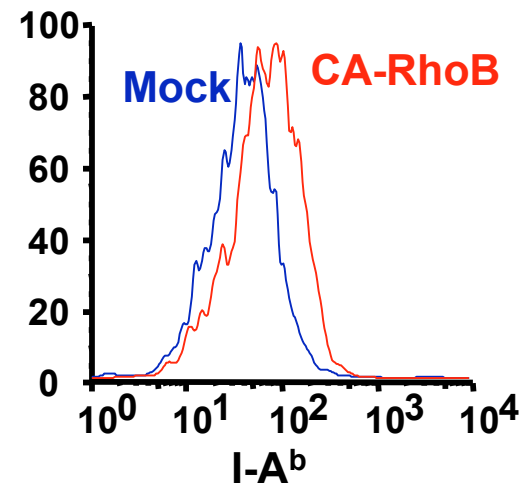

Kamon et al.  
Figure S7

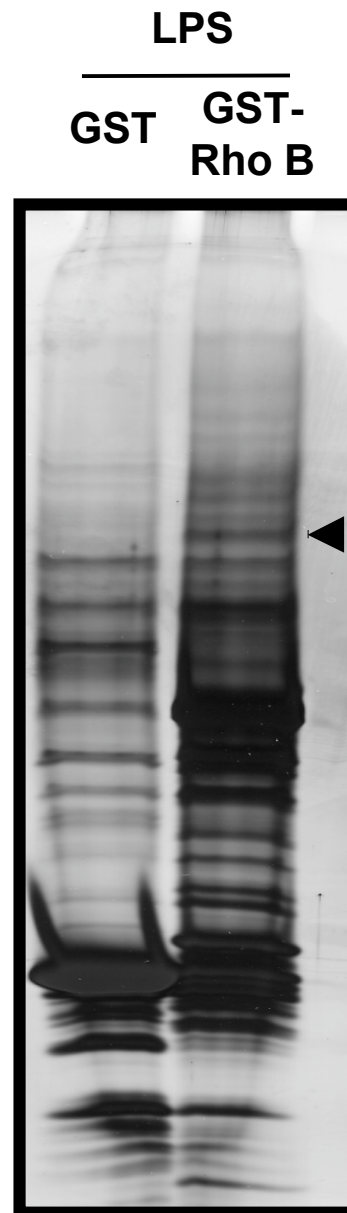

Kamon et al.  
Supplementary  
Figure S8

**Untreated**

**WT**

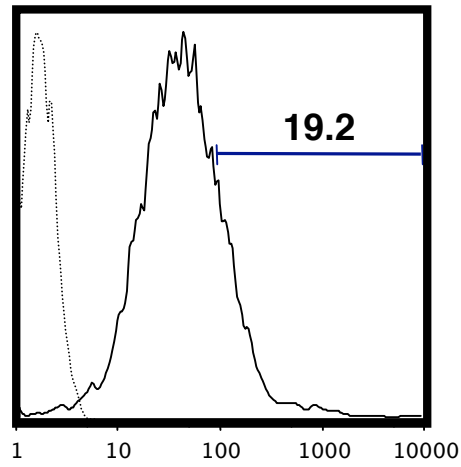

**TRIFKO**

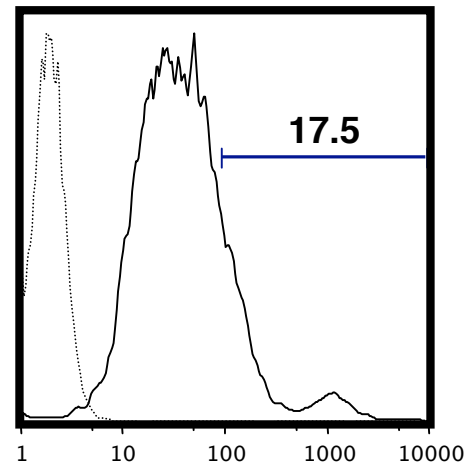

**IFN $\alpha$  $\beta$ RKO**

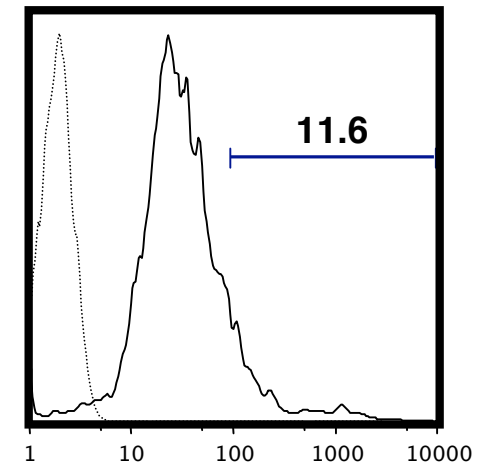

**LPS**

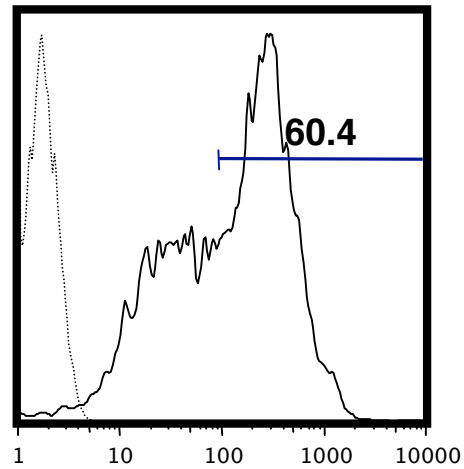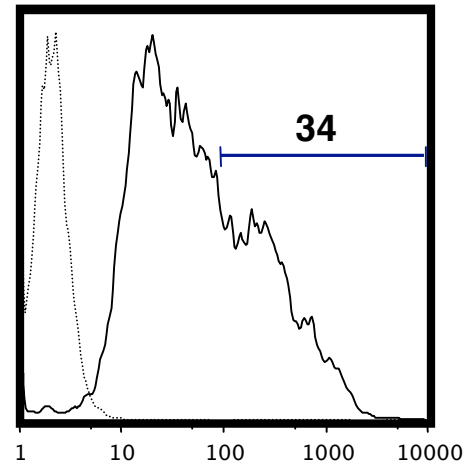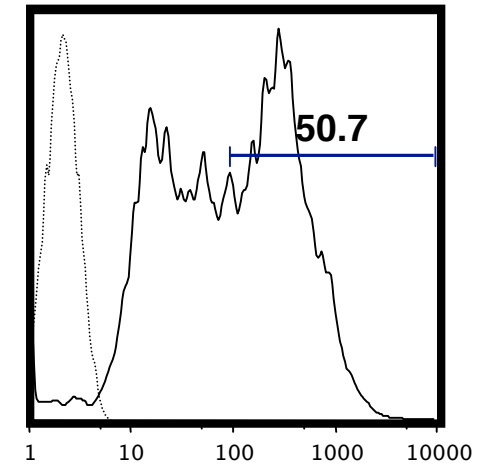

**MHCII**



Kamon et al.  
Figure S9

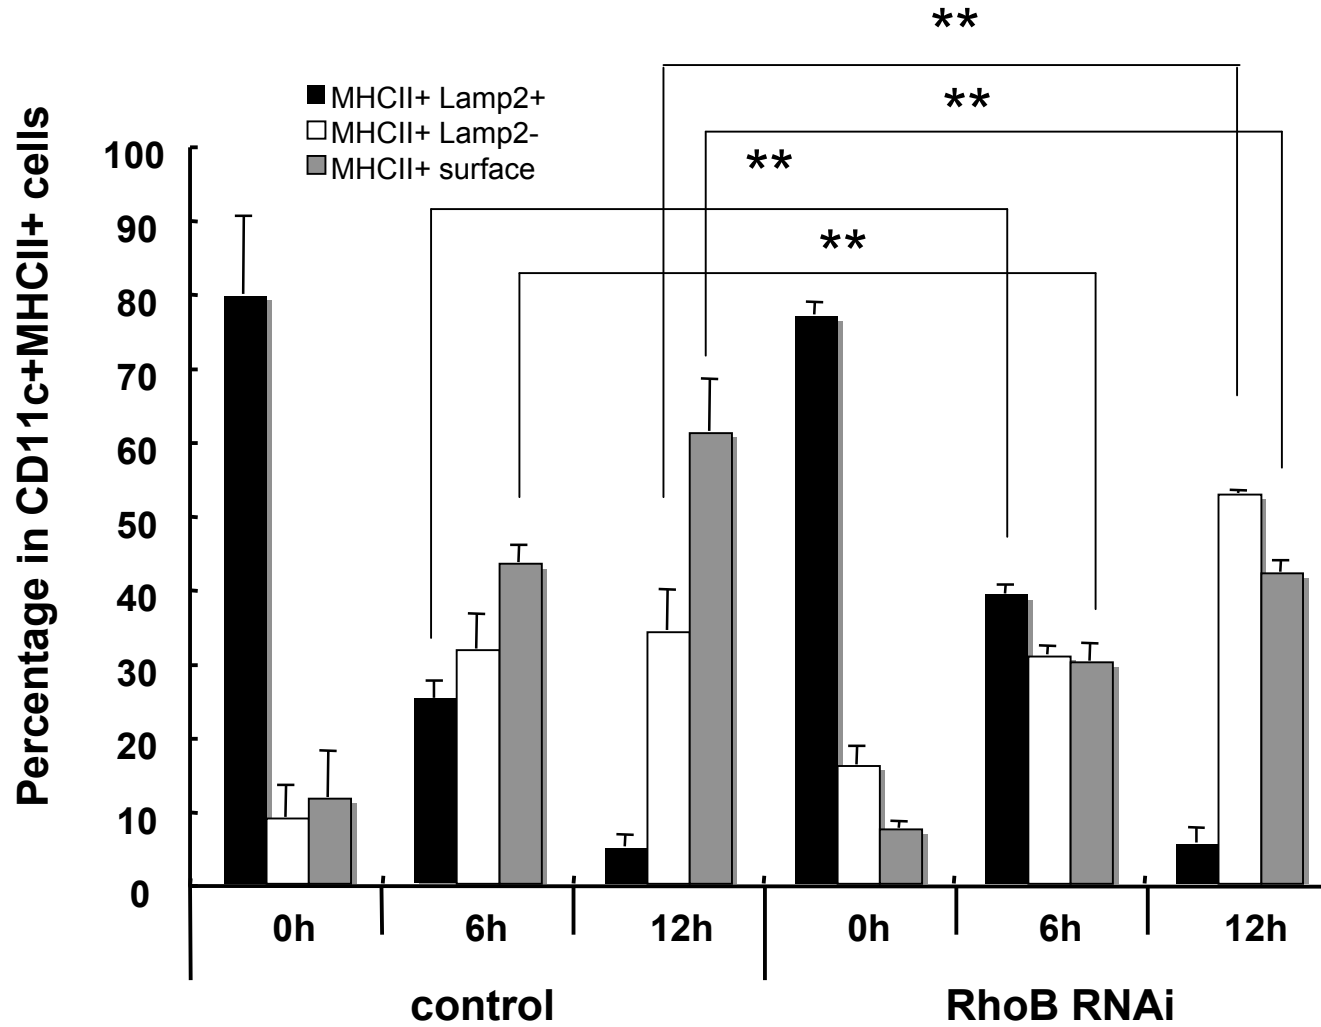

Kamon et al.  
Figure S10

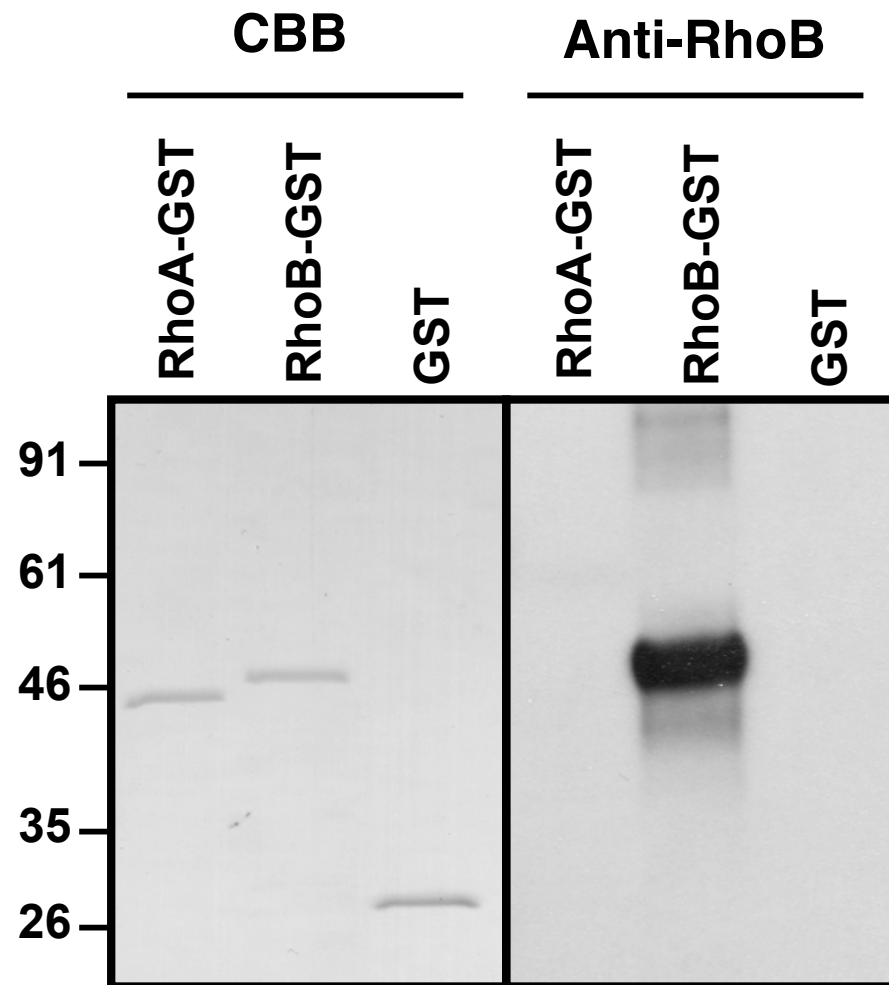

Supplement: 7601286s1.pdf [file 7601286s1.pdf]
