# Supplementary material
Source: PubMed Central journal article supplement (PMC1560350)
Supplement: 7601286s2.pdf [file 7601286s2.pdf]

| Primers | usage                | Fwd                                                                                  | Rev                                   |
|---------|----------------------|--------------------------------------------------------------------------------------|---------------------------------------|
| GEFH1   | to get a full length | 5'-ATTATGTCTCGGATCGAATC-3'                                                           | 5'-ATCGATAGTGCCCTTAGCTCTCTG-3'        |
| GEFH1   | to get a DNGEFH1     | 5'-GATCACCAAAGCCCCTGTGCTC-3'                                                         | 5'-GAGCACAGGGGCTTTGGTGATC-3'          |
| RhoB    | to get a DNRhoB      | 5'- GCGGCCGCATGGCGGCCATCCGCAAGAAGCTGGTGGTGGTGGGCGACGGCGGTGCGGCAAGAATTGCCTGCTGATCA-3' | 5'- ATCGATTCATAGCACCTTGCAGCAGTT-3'    |
| RhoB    | to get a CARhoB      | 5'-GCGGCCGCATGGCGGCCATCCGCAAGAAGCTGGTGGTGGTGGGCGACGTGGCGTGCGGCAAGACGTGC-3'           | 5'- ATCGATTCATAGCACCTTGCAGCAGTT-3'    |
| RhoA    | to get a DNRhoA      | 5'-GCGGCCGCATGGCTGCCATCAGGAAGAACTGGTGATTGTTGGTGATGGAGCTTGTGGTAAGAAGTGC -3'           | 5'-ATCGATT CACAAGATGAGGCACCCAGAGC-3'  |
| RhoB    | to get a CARhoBGST   | 5'- AAGGGTCGACATGGCGGCCATCCGCAAGAAGCTGGTGGTGGTGGGCGACGTGGCGTGCGGCAAGACGTGC-3'        | 5'-GAGAAAGCTTTCATAGCACCTTGCAGCAGT -3' |
| RhoB    | RT-PCR               | 5'- CTGGCCCGCATGAAGCAGGA-3'                                                          | 5'-TCATAGCACCTTGCAGCAGTT-3'           |
| GEFH1   | RT-PCR               | 5'-AGACAGAGGATAAGGCGTAT-3'                                                           | 5'-GAGGGACTCAAGGACTCAA-3'             |
| RhoB    | real time PCR        | 5'-ATGACTACCTCGAGTGCTCG-3'                                                           | 5'-ACTGCTGCAAGGTGCTATGA-3'            |
